# Supplementary material
Source: Springer Nature journal article supplement (https://www.springermedizin.de/resource/supplementary/12936_2009_1164_MOESM3_ESM.pdf/9550010)

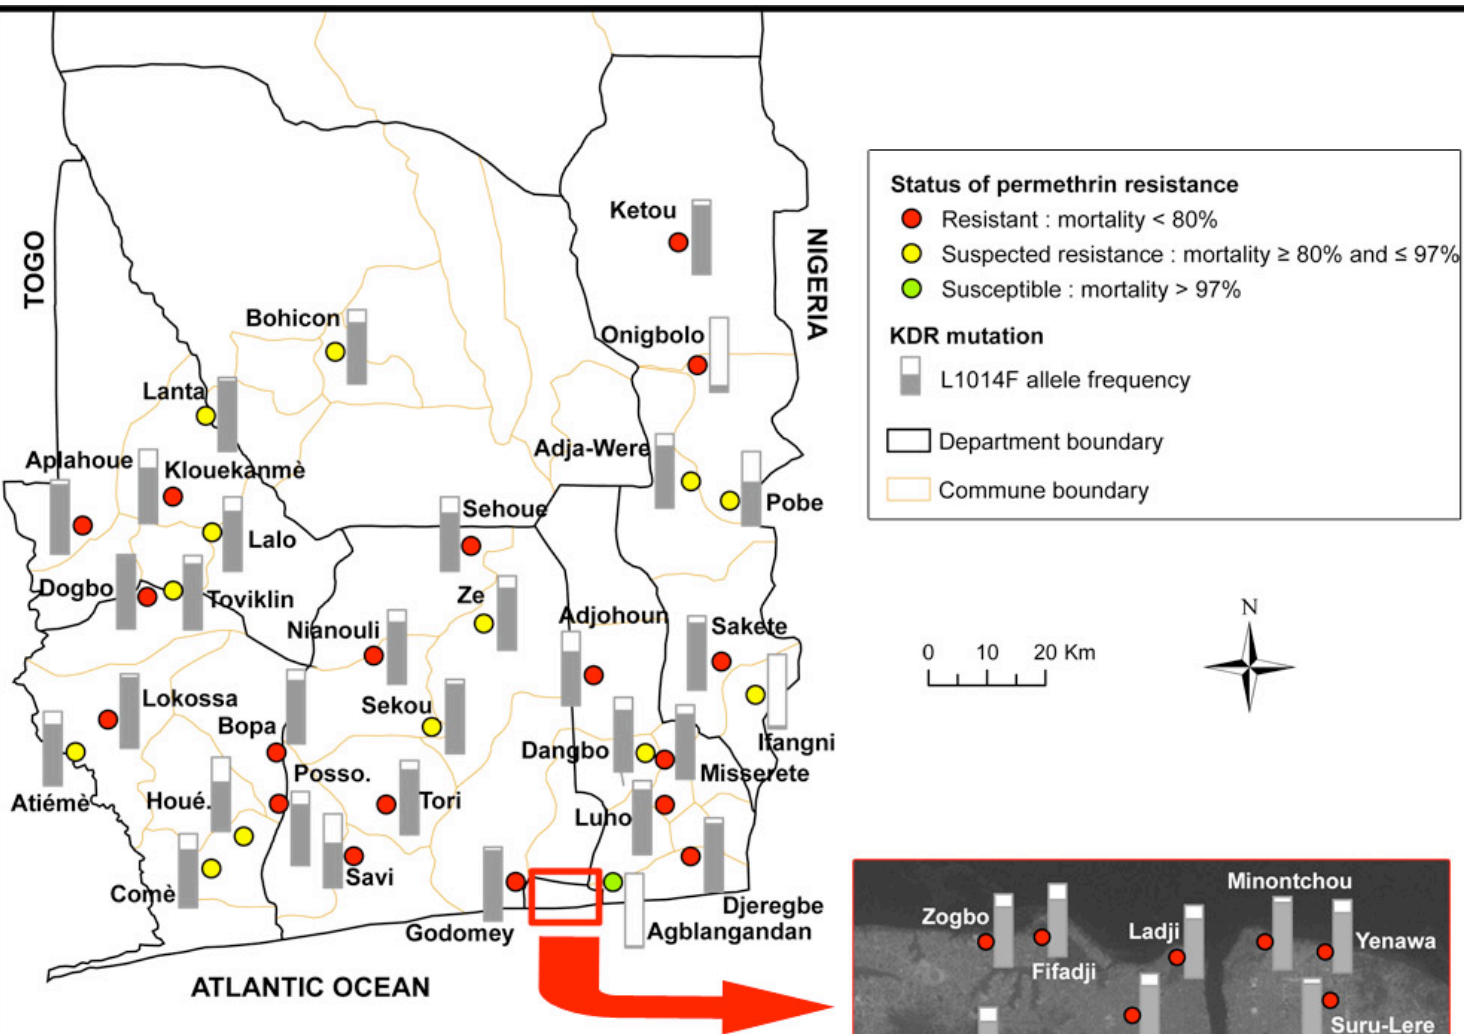

Sources : DCW, Landsat image ETM+ Pansharpened 2000.  
 Realisation : Abdoul-Sahabi BIO BANGANA and  
 Nicolas MOIROUX, UR016 IRD/CREC 2010.

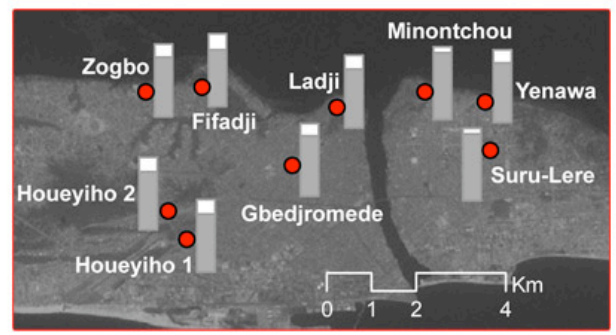

Supplement: MOESM3 [file 9550010]
